# Supplementary material for: Mutant p53 Aggregates into Prion-like Amyloid Oligomers and Fibrils: IMPLICATIONS FOR CANCER
Source: PubMed Central journal article supplement — J Biol Chem. 2012 Jun 19;287(33):28152–62. doi: 10.1074/jbc.M112.340638 (PMC3431633; doi:10.1074/jbc.m112.340638), 2012-06-19
Supplement: supp_M112.340638_jbc.M112.340638-3.pdf [file supp_M112.340638_jbc.M112.340638-3.pdf]

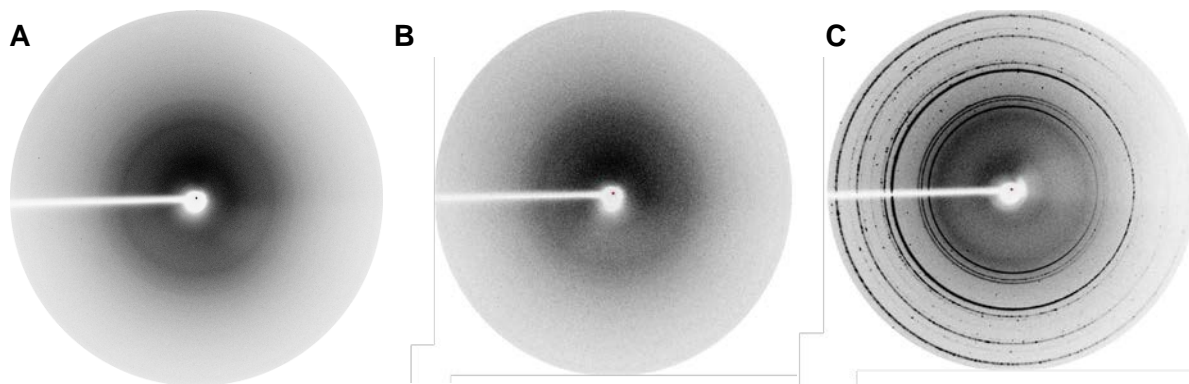

**Supplemental Figure S2. X-ray diffraction of p53C aggregates obtained by high temperature.** (A) WT p53C at pH 7.2; (B) R248Q p53C at pH 7.2 and (C) WT p53C at pH 5.0 were diffracted showing reflections from 4.7 to 10 Å, characterizing structures in cross  $\beta$ -sheets.
